# Supplementary material for: Effects of simulated daily precipitation patterns on annual plant populations depend on life stage and climatic region
Source: Springer Nature journal article supplement (doi:10.1186/1472-6785-8-4), 2008-01-01
Supplement: Additional file 1 [file 1472-6785-8-4-s1.pdf]

Standard parameters used in the soil module.

| climate                       | arid          | semi-arid     | dry<br>Mediterranean | typical<br>Mediterranean | mesic<br>Mediterranean | range<br>in sensitivity analysis |
|-------------------------------|---------------|---------------|----------------------|--------------------------|------------------------|----------------------------------|
| soil texture (1)              | sandy loam    | loam          | clayey loam          | clay                     | clay                   |                                  |
| moisture retention (2)        |               |               |                      |                          |                        |                                  |
| $\theta_S$ (v/v)              | 0.35          | 0.4           | 0.45                 | 0.5                      | 0.55                   | [0.3, 0.7]                       |
| $\theta_R$ (v/v)              | 0.015         | 0.03          | 0.04                 | 0.04                     | 0.05                   | [0.01, 0.1]                      |
| $\alpha$                      | 62            | 59            | 84                   | 108                      | 78                     | [20, 1600]                       |
| $\beta$                       | 1.38          | 1.27          | 1.26                 | 1.25                     | 1.22                   | [1.1, 1.8]                       |
| depth A4 layer (cm) (3)       | 1             | 5             | 10                   | 15                       | 10                     | [1, 15]                          |
| infiltration rate (4)         |               |               |                      |                          |                        |                                  |
| $I_{dry}$ (%)                 | 92            | 93            | 94                   | 100                      | 99                     | [70, 100]                        |
| $\Delta I$                    | -36           | -29           | -20                  | -1                       | -9                     | -[0, 40]                         |
| hydraulic conductivity        |               |               |                      |                          |                        |                                  |
| $K_A$ (%)                     | 30            | 50            | 60                   | 70                       | 60                     | [30, 100]                        |
| permeability $P$ (%) (4)      | 100           | 100           | 100                  | 100                      | 70                     | [50, 100]                        |
| evaporation rate              |               |               |                      |                          |                        |                                  |
| $E_O$                         | $3.0 \cdot T$ | $3.0 \cdot T$ | $3.0 \cdot T$        | $3.0 \cdot T$            | $3.0 \cdot T$          | $[1.5, 4] \cdot T$               |
| $E_{A1}$                      | 3.0           | 3.0           | 2.5                  | 2.5                      | 2.0                    | [1.5, 4]                         |
| surface heterogeneity $H$ (%) | 90            | 50            | 20                   | 10                       | 10                     | [0, 100]                         |

$T$ : daily temperature (°C)

- (1) Sara Pariente, pers. comm.
- (2) van-Genuchten parameters derived from water content measurements at similar sites (Sara Pariente, pers. comm.)
- (3) H. Lavee, pers. comm.
- (4) derived from runoff measurements at the field sites (H. Lavee, unpublished results, 2004)
