# Supplementary material for: Effects of simulated daily precipitation patterns on annual plant populations depend on life stage and climatic region
Source: Springer Nature journal article supplement (doi:10.1186/1472-6785-8-4), 2008-01-01
Supplement: Additional file 2 [file 1472-6785-8-4-s2.pdf]

Standard parameters used for seed germination.

| climate                                           | arid                  | semi-arid                       | dry<br>Mediterranean              | typical<br>Mediterranean | mesic<br>Mediterranean             | range<br>in sensitivity analysis |
|---------------------------------------------------|-----------------------|---------------------------------|-----------------------------------|--------------------------|------------------------------------|----------------------------------|
| representative species<br>(for illustration only) | <i>Stipa capensis</i> | <i>Crithopsis<br/>delileana</i> | <i>Trisetaria<br/>macrochaeta</i> | <i>Avena sterilis</i>    | <i>Brachypodium<br/>dystachium</i> |                                  |
| seed bank density (seeds/m <sup>2</sup> )         | 500 (1)               | 11'000 (1)                      | 15'000                            | 17'000 (1)               | 30'000 (1)                         | [500, 50'000] (1)                |
| range (%)                                         | ±50 (1)               | ±11 (1)                         | ±11                               | ±11 (1)                  | ±11 (1)                            |                                  |
| seed bank persistence (%)                         | 90                    | 90                              | 90                                | 90                       | 90                                 |                                  |
| survival of dispersed seeds (%)                   | 30±5                  | 30±5                            | 30±5                              | 30±5                     | 30±5                               |                                  |
| granivory threshold (seeds/m <sup>2</sup> )       | 20'000                | 20'000                          | 20'000                            | 20'000                   | 20'000                             |                                  |
| hydrothermal time                                 |                       |                                 |                                   |                          |                                    |                                  |
| $\Psi_{b50}$ (MPa)                                | -1.03 (3)             | -0.87 (3)                       | -1.00                             | -0.86 (3)                | -0.67 (3)                          | [-1.5, 0.5] (2)                  |
| $\sigma$ (MPa)                                    | 0.5 (2)               | 0.5 (2)                         | 0.5 (2)                           | 0.5 (2)                  | 0.5 (2)                            | [0.2, 0.9] (2)                   |
| $T_b$ (°C)                                        | 0 (3)                 | 0 (3)                           | 0 (3)                             | 0 (3)                    | 0 (3)                              |                                  |
| $\theta_{HT}$ (MPa·K·d)                           | 25 (3)                | 31 (3)                          | 30 (3)                            | 28 (2)                   | 23 (3)                             | [12, 130] (2,3)                  |
| dry days                                          | 7                     | 7                               | 7                                 | 7                        | 7                                  | [5, 10]                          |
| density regulation                                |                       |                                 |                                   |                          |                                    |                                  |
| $a$                                               | 0.77 (4)              | 0.77 (4)                        | 0.77 (4)                          | 0.77 (4)                 | 0.77 (4)                           | [0.5, 1.0] (4)                   |
| $\pm\Delta a$                                     | 0.02                  | 0.02                            | 0.02                              | 0.02                     | 0.02                               | ±[0.0, 0.1] (4)                  |

Only two seed parameters (shown in red) were varied among species to facilitate the interpretation of results.

- (1) field experiment; M. Sternberg, unpubl. data.
- (2) Allen PS, Meyer SE, Khan MA: **Hydrothermal time as a tool in comparative germination studies**. In *Seed Biology: Advances and Applications* Edited by Black M, Bradford KJ, Vázquez-Ramos J. Wallingford, U.K.: CAB International; 2000:401-410.  $\sigma$  is the aggregated standard deviation of psammophytes and generalist species.
- (3) Köchy M, Tielbörger K: **Hydrothermal time model of germination: parameters for 36 Mediterranean annual species based on a simplified approach**. *Basic and Applied Ecology* 2007, **8**:171-182 (doi:10.1016/j.baae.2006.04.002).
- (4) derived from Goldberg DE, Turkington R, Olsvig-Whittaker L, Dyer AR: **Density dependence in an annual plant community: variation among live history stages**. *Ecological Monographs* 2001, **71**:423-446.
