# Supplementary material for: Effects of simulated daily precipitation patterns on annual plant populations depend on life stage and climatic region
Source: Springer Nature journal article supplement (doi:10.1186/1472-6785-8-4), 2008-01-01
Supplement: Additional file 5 [file 1472-6785-8-4-s5.pdf]

Overview of climatic variables of stations near the field sites.

| climate station | longitude<br>(° E) | latitude<br>(°N) | years     | annual precipitation<br>(mm) |    | days per year with<br>precip. >5 mm |    |          | days per year with<br>precip. >15 mm |    |          | days per year with<br>precip. >25 mm |    |          |
|-----------------|--------------------|------------------|-----------|------------------------------|----|-------------------------------------|----|----------|--------------------------------------|----|----------|--------------------------------------|----|----------|
|                 |                    |                  |           | mean                         | CV | mean                                | SD | interval | mean                                 | SD | interval | mean                                 | SD | interval |
| Sede Boqer      | 34.78              | 31.23            | 1952-2000 | 89                           | 47 | 6                                   | 3  | 18       | 1                                    | 1  | 25       | 0                                    | 1  | 39       |
| Be'er Sheba     | 34.90              | 31.62            | 1957-2000 | 196                          | 36 | 12                                  | 4  | 7        | 3                                    | 2  | 32       | 1                                    | 1  | 20       |
| Beth Guvrin     | 35.03              | 31.80            | 1950-2000 | 395                          | 34 | 22                                  | 6  | 3        | 9                                    | 4  | 12       | 4                                    | 2  | 19       |
| Rosh Zurim      | 35.22              | 33.05            | 1983-2000 | 567                          | 38 | 26                                  | 7  | 3        | 13                                   | 5  | 7        | 7                                    | 4  | 14       |
| Beth Meir       | 35.50              | 32.97            | 1977-2000 | 625                          | 32 | 29                                  | 7  | 3        | 14                                   | 5  | 7        | 8                                    | 4  | 17       |
| Har Kena'an     | 34.79              | 30.87            | 1940-1999 | 717                          | 26 | 36                                  | 8  | 2        | 16                                   | 5  | 7        | 8                                    | 3  | 12       |
| Elon            | 35.45              | 33.07            | 1974-2000 | 813                          | 26 | 38                                  | 8  | 2        | 19                                   | 5  | 6        | 9                                    | 4  | 14       |

SD: standard deviation, CV: coefficient of variation. 'interval' is the mean across years of the median interval between days with the respective amount of rain.
